# Supplementary material for: Tannin-assisted interfacial polymerization towards COF membranes for efficient dye separation
Source: Royal Society of Chemistry journal article supplement (doi:10.1039/d4ra02838d), 2024-01-01
Supplement: d4ra02838d1.pdf [file d4ra02838d1.pdf]

## Tannin-assisted interfacial polymerization towards COF membranes for efficient dye separation

Weishan Deng, †<sup>a</sup> Zezhen Zhang, †<sup>a</sup> Lulu Liu, <sup>a</sup> Zekun Zhou <sup>a</sup> and Lili Wu\*<sup>a</sup>

<sup>a</sup> School of Materials Science and Engineering, Wuhan University of Technology, Wuhan 430070, China.

† These two authors contribute equally to this work.

\* Corresponding author

### Supporting Figure

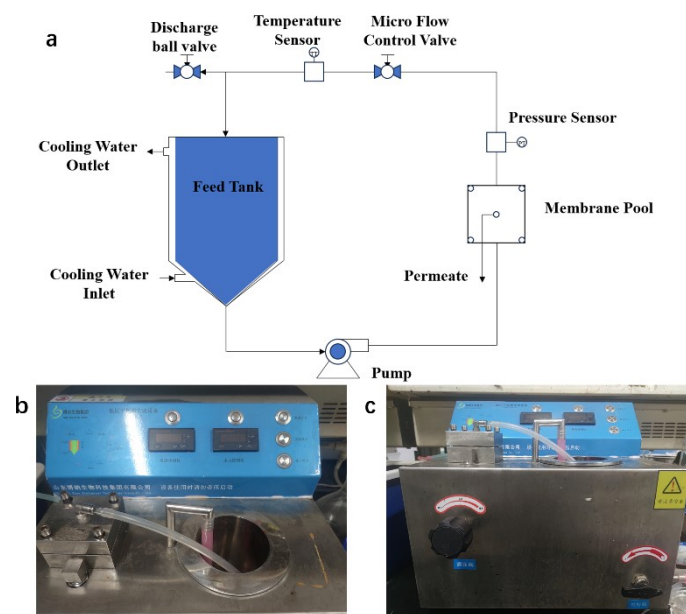

Fig S1. (a) Schematic diagram of the working principle of the laboratory mis-flow machine; (b) (c) Photographs of the laboratory mis-flow machine

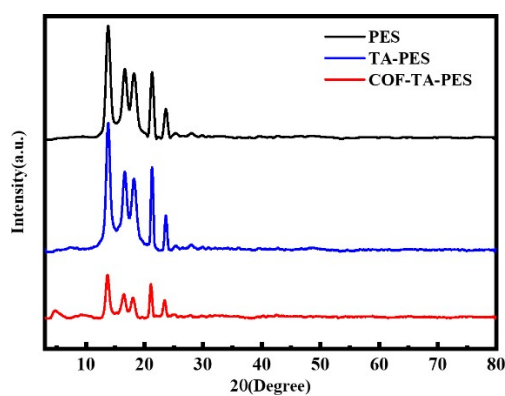

Fig S2. XRD patterns of the original membrane (black) TA-PES membrane (blue) and the COF-TA-PES membrane (red)

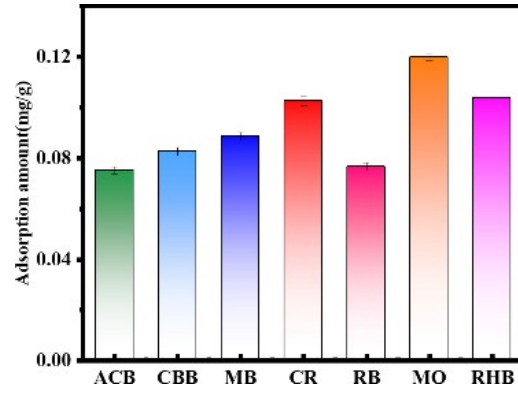

Fig S3. Adsorption amount of dyes by original membrane

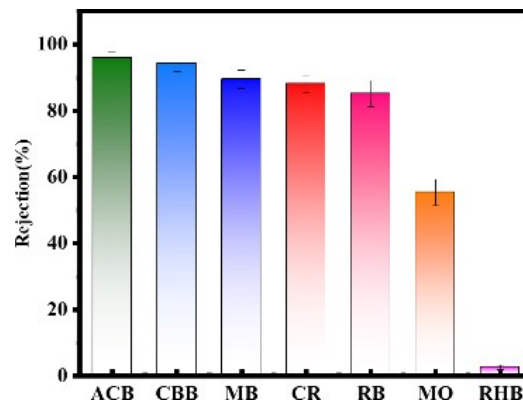

Fig S4. Dye rejection rate of original membrane
